# Supplementary material for: A 25-gene classifier predicts overall survival in resectable pancreatic cancer
Source: Springer Nature journal article supplement (doi:10.1186/s12916-017-0936-z), 2017-09-15
Supplement: MOESM3 [file 15074058]

# **A 25-gene classifier predicts overall survival in resectable pancreatic cancer**

...

## **Sweave report**

...

David J Birnbaum, Pascal Finetti, Alexia Lopresti,  
Marina Gilabert, Flora Poizat, Jean-Luc Raoul,  
Jean-Robert Delpero, Vincent Moutardier, Daniel Birnbaum,  
Emilie Mamessier, François Bertucci

# 1 Preparation of public data

## 1.1 Loading description file sets with their location:

```
> library(xtable)
> Path <- "G:\\Pancreas"
> setwd(paste(Path, "GES_surv", sep="\\"))
> Set <- read.delim(paste(Path, "Description_SetExt.eSet_PA.txt", sep="\\"))
> print(xtable(Set[,c(1:4)]), size="footnotesize", include.rownames = FALSE)
```

| Cohort        | DataSet_ID          | Platform                    | FileName                             |
|---------------|---------------------|-----------------------------|--------------------------------------|
| Stratford2010 | GSE21501            | Agilent-014850 WHG 4x44K    | 2010_Straford_GSE21501_S4.RData      |
| vdBroeck2012  | GSE42952            | Affymetrix HG-U133 Plus 2.0 | 2012_vdBroeck_GSE42952_S4.RData      |
| Zhang2012     | GSE28735            | Affymetrix HG-1.0 ST        | 2012_Zhang_GSE28735_S4.RData         |
| Winter2012    | E-MEXP-2780         | Affymetrix HG-U133 Plus 2.0 | 2012_Winter_E.MEXP_2780_S4.RData     |
| TCGA2015      | TCGA_PAAD           | RNAseq Illumina v3          | 20151020_PAAD.TCGA_RNAseqV2_S4.RData |
| Bailey2016    | Bailey_ICGC-PACA-AU | RNAseq Illumina             | 2016_Bailey_Nat2016_S4.RData         |
| Chen2015      | GSE57495            | Affymetrix, custom          | 2015_Chen_PAAD_GSE57495_RMA_S4.RData |
| Kirby2016     | GSE79668            | RNAseq, Illumina High-Seq   | 2016_Kirby_GSE79668_S4.RData         |
| Collisson2013 | GSE17891            | Affymetrix HG-U133 Plus 2.0 | 2013_Collisson_GSE17891_RMAs4.RData  |

Public sets<sup>1</sup>

## 1.2 Merging phenodata from .RData objects

```
> PublicSet <- list(HC=c()); require(affy)
> for (i in seq_along(Set$Nom_ObjHC)){
+   load(paste(Path, "Rdata_ObjSets", Set$FileName[i], sep="\\"))
+   PublicSet$HC <- rbind(PublicSet$HC, pData(Eset_Obj)); rm(Eset_Obj)
+ }
> print(xtable(data.frame(table(PublicSet$HC$SetName)),
+   caption="Merged phenodata effectif",
+   size="footnotesize",
+   include.rownames = FALSE)
```

| Var1                           | Freq |
|--------------------------------|------|
| 2010_Straford_GSE21501_S4      | 132  |
| 2012_vdBroeck_GSE42952_S4      | 23   |
| 2012_Winter_E.MEXP_2780_S4     | 30   |
| 2012_Zhang_GSE28735_S4         | 90   |
| 2013_Collisson_GSE17891_RMAs4  | 27   |
| 2015_Chen_PAAD_GSE57495_RMA_S4 | 63   |
| 20151020_PAAD.TCGA_RNAseqV2_S4 | 183  |
| 2016_Bailey_Nat2016_S4         | 96   |
| 2016_Kirby_GSE79668_S4         | 51   |

Merged phenodata effectif

<sup>1</sup>Each of .RData objects listed were previously constructed from expression data and phenodata available. Phenodata were cleaned and homogenized across data sets. For Agilent-based data sets, we applied quantile normalization (*limma* package) to processed data. For Affymetrix-based data sets, we used Robust Multichip Average (RMA, *affy* package) on the raw .CEL files. Updated genechips annotation were integrated in their respective .RData object.

### 1.3 Selection of primary PACA samples w/ survival and w/o duplicate measurement

```
> # Overall survival (OS)
> sel_Primaire <- which(PublicSet$HC$Type %in% "Primary" &
+                      PublicSet$HC$Duplicate %in% "unique" &
+                      PublicSet$HC$OS.Evt >= 0 & PublicSet$HC$OS.Del >= 0)
> length(sel_Primaire)
```

[1] 601

### 1.4 Variables preparation and groups selection

Variables list

```
> VAR_List <- as.list(PublicSet$HC)
> VAR_ListSurv <- list(OS=list(Evt=PublicSet$HC$OS.Evt, Del=PublicSet$HC$OS.Del))
```

Definition STS and LTS groups, i.e. event  $\leq 6$  months and censorship  $\geq 36$  months

```
> GRP_STS6m36m <- rep(NA, nrow(PublicSet$HC))
> GRP_STS6m36m[intersect(sel_Primaire,
+                        which(VAR_ListSurv$OS$Evt == 1 & VAR_ListSurv$OS$Del <= 6))] <- "STS"
> GRP_STS6m36m[intersect(sel_Primaire,
+                        which(VAR_ListSurv$OS$Evt == 0 & VAR_ListSurv$OS$Del >= 36))] <- "LTS"
```

Selection learning set : Bailey and TCGA sets, STS and LTS groups (N=39)

```
> selLearn <- intersect(sel_Primaire,
+                       which(PublicSet$HC$Cohort %in% c("Bailey2016", "TCGA2015") &
+                             ((VAR_ListSurv$OS$Evt == 1 & VAR_ListSurv$OS$Del <= 6) |
+                              (VAR_ListSurv$OS$Evt == 0 & VAR_ListSurv$OS$Del >= 36))))
```

Selection validation set : all remaining primary PACA (N=562)

```
> sel562 <- setdiff(sel_Primaire, selLearn)
```

Effectif learning and validation cohorts

```
> GRP_Learn_val <- rep(NA, nrow(PublicSet$HC))
> GRP_Learn_val[selLearn] <- "Learning"
> GRP_Learn_val[sel562] <- "Validation"
> print(xtable(data.frame(table(PublicSet$HC$Cohort[sel_Primaire],
+                               GRP_Learn_val[sel_Primaire])[c(1,6,2:5,7:9)]),
+           caption="Learning and validation cohort",
+           size="footnotesize",
+           include.rownames = TRUE)
```

|               | Learning | Validation |
|---------------|----------|------------|
| Bailey2016    | 17       | 79         |
| TCGA2015      | 22       | 156        |
| Chen2015      | 0        | 63         |
| Collisson2013 | 0        | 27         |
| Kirby2016     | 0        | 51         |
| Stratford2010 | 0        | 102        |
| vdBroeck2012  | 0        | 12         |
| Winter2012    | 0        | 30         |
| Zhang2012     | 0        | 42         |

Learning and validation cohort

## 2 Molecular subtypes classification of public data

### 2.1 Bailey, Collisson and Moffitt classifications, 9 data sets

```
> RES_List <- list()
> for ( i in 1:nrow(Set)){
+   load(paste(Path, "RData_ObjSets", Set$FileName[i], sep="\\"))
+   ##### import chip annot
+   Annotation <- annotation(Eset_Obj)
+   load(paste(Path, "RData_ObjSets\\chip", Annotation, ".RData", sep=""))
+   CHIP <- CHIP[match(featureNames(Eset_Obj), CHIP$PID),] # internal ctrl
+   ##### data matrix
+   DATA <- exprs(Eset_Obj)
+   ##### Classification :
+   ### Baileys molecular subtypes
+   source("g:/Ori Tools/Prog/Rwork/Script/Classifier/20160607_Bailey_PAAD_4KssType.r")
+   Bailey_Tmp <- Bailey.PF(DATA, CHIP$GeneID, Set$Nom_ObjHC[i])
+   RES_Bailey_Tmp <- data.frame(Bailey_Tmp)
+   colnames(RES_Bailey_Tmp) <- paste("Bailey", colnames(RES_Bailey_Tmp), sep="_")
+   ### Collissons molecular subtypes
+   source("g:/Ori Tools/Prog/Rwork/Script/Classifier/20160930_Collisson_PAAD_3KssType.r")
+   Collisson_Tmp <- Collisson_PAAD.PF( DATA, CHIP$GeneID, Set$Nom_ObjHC[i])
+   RES_Collisson_Tmp <- data.frame(Collisson_Tmp)
+   colnames(RES_Collisson_Tmp) <- paste("Collisson", colnames(RES_Collisson_Tmp), sep="_")
+   ### Moffitts molecular subtypes
+   source("g:/Ori Tools/Prog/Rwork/Script/Classifier/20161003_Moffitt_PAAD_2x2KssType.r")
+   Moffitt_Tmp <- Moffitt_PAAD.PF(DATA, CHIP$GeneID, Set$Nom_ObjHC[i])
+   RES_Moffitt_Tmp <- data.frame(Moffitt_Tmp)
+   colnames(RES_Moffitt_Tmp) <- paste("Moffitt", colnames(RES_Moffitt_Tmp), sep="_")
+   ###
+   rm(Eset_Obj, DATA, CHIP)
+ }
> ##### Merge classifications
> RES_Pool <- c()
> for (i in 1:length(RES_List)){
+   RES_Pool <- rbind(RES_Pool, cbind(RES_List[[i]],
+                                     Set=rep(Set$Nom_ObjHC[i], nrow(RES_List[[i]])))
+ }
> VAR_List <- c(VAR_List, as.list(RES_Pool))
```

## 3 Supervised analysis, STS vs. LTS

### 3.1 Merge of Bailey and TCGA sets, learning set

```
> require(inSilicoMerging)
> # Import Bailey and TCGA expression set object
> LearnObj <- list()
> load(paste(Path, "Rdata_ObjSets\\2016_Bailey_Nat2016_S4.RData", sep="\\"))
> LearnObj$Bailey <- Eset_Obj
> load(paste(Path, "Rdata_ObjSets\\20151020_PAAD_TCGA_RNAseqV2_S4.RData", sep="\\"))
> LearnObj$TCGA <- Eset_Obj
> rm(Eset_Obj)
> # Merge both set,
> Eset_Obj <- merge(LearnObj, method="COMBAT") # merge w/ empirical Bayes normalisation
> Eset_None <- merge(LearnObj, method="NONE") # merge w/o inter-set normalisation (ctrl)
```

## 3.2 Normalization evaluation with PCA and Bailey molecular subtypes

Objects preparation on Bailey's molecular subtypes genes

```
> # Bailey et al. genes list : obj. ref
> load("G:\\dat ext\\R.Ref.GES\\Bailey.Classifier.RData")
> # Prep. merge data object
> source("g:/Ori Tools/Prog/Rwork/Script/data handle/Manip.data.r")
> load(paste(Path, "Rdata_ObjSets\\chip", annotation(Eset_Obj), sep="\\")) # load chip annot.
> CHIP <- CHIP[match(featureNames(Eset_Obj), CHIP$PID),]
> Obj_Bailey <- export.data.PF(exprs(Eset_Obj), CHIP$GeneID, ref, ref$GeneID)
> Obj_Bailey$INFO <- pData(Obj_Bailey)
> # Prep. merge data ctrl object
> load(paste(Path, "Rdata_ObjSets\\chip", annotation(Eset_None), sep="\\")) # load chip annot.
> CHIP <- CHIP[match(featureNames(Eset_None), CHIP$PID),]
> Obj_Bailey_None <- export.data.PF(exprs(Eset_None), CHIP$GeneID, ref, ref$GeneID)
> Obj_Bailey_None$INFO <- pData(Obj_Bailey_None)
```

PCA preparation, selection of PACA and visualization groups

```
> selPrim <- which(Obj_Bailey$INFO$Type %in% "Primary" &
+                 Obj_Bailey$INFO$Duplicate %in% "unique" &
+                 Obj_Bailey$INFO$OS.Evt >= 0 & Obj_Bailey$INFO$OS.Del >= 0)
> # Grps defintion
> GRP_Subtype <- Obj_Bailey$INFO$Bailey
> GRP_SubtypeCol <- ifelse(GRP_Subtype %in% "ADEX", "brown",
+                          ifelse(GRP_Subtype %in% "Squamous", "blue",
+                                  ifelse(GRP_Subtype %in% "Immunogenic", "red",
+                                          ifelse(GRP_Subtype %in% "Pancreatic_Progenitor",
+                                                  "orange", NA))))
> GRP_Set <- c(rep("ICGC-RNaseq", ncol(LearnObj$Bailey)), rep("TCGA-RNaseq", ncol(LearnObj$TCGA)))
> GRP_Setcol <- ifelse(GRP_Set == "ICGC-RNaseq", "blue", "red")
```

PCA w/ plots

```
> source("G:\\Ori Tools\\Prog\\Rwork\\Script\\PCA_AutoPlot.r")
> par(mfrow=c(2,2))
> # PCA ctrl none ~ set
> PCA_PF(DATA=Obj_Bailey_None$data.sel[,selPrim], Cex=0.5,
+        GRP=GRP_Set[selPrim], GRP_COL=GRP_Setcol[selPrim], Ellipse=TRUE, Traits=F, IC="CI95")
> legend("topleft", c("ICGC-RNaseq", "TCGA-RNaseq"), pch=19, col=c("blue", "red"),
+        box.col=0, cex=0.75)
> title("ICGC- & TCGA-RNaseq, Raw") ; box()
> # PCA ctrl none ~ subtypes
> PCA_PF(Obj_Bailey_None$data.sel[,selPrim], Cex=0.5,
+        GRP_Subtype[selPrim], GRP_SubtypeCol[selPrim], Ellipse=TRUE, Traits=F, IC="CI95")
> legend("topleft", c("ADEX", "Immunogenic", "Progenitor", "Squamous"), pch=19,
+        col=c("brown", "red", "orange", "blue"), box.col=0, cex=0.75)
> title("ICGC- & TCGA-RNaseq, Raw") ; box()
> # PCA norm. sets ~ set
> PCA_PF(Obj_Bailey$data.sel[,selPrim], Cex=0.5,
+        GRP_Set[selPrim], GRP_Setcol[selPrim], Ellipse=TRUE, Traits=F, IC="CI95")
> legend("bottomleft", c("ICGC-RNaseq", "TCGA-RNaseq"), pch=19,
+        col=c("blue", "red"), box.col=0, cex=0.75)
> title("ICGC- & TCGA-RNaseq, Norm.") ; box()
> # PCA norm. sets ~ subtypes
> PCA_PF(Obj_Bailey$data.sel[,selPrim], Cex=0.5,
+        GRP_Subtype[selPrim], GRP_SubtypeCol[selPrim], Ellipse=TRUE, Traits=F, IC="CI95")
> legend("bottomleft", c("ADEX", "Immunogenic", "Progenitor", "Squamous"), pch=19,
+        col=c("brown", "red", "orange", "blue"), box.col=0, cex=0.75)
> title("ICGC- & TCGA-RNaseq, Norm.") ; box()
```

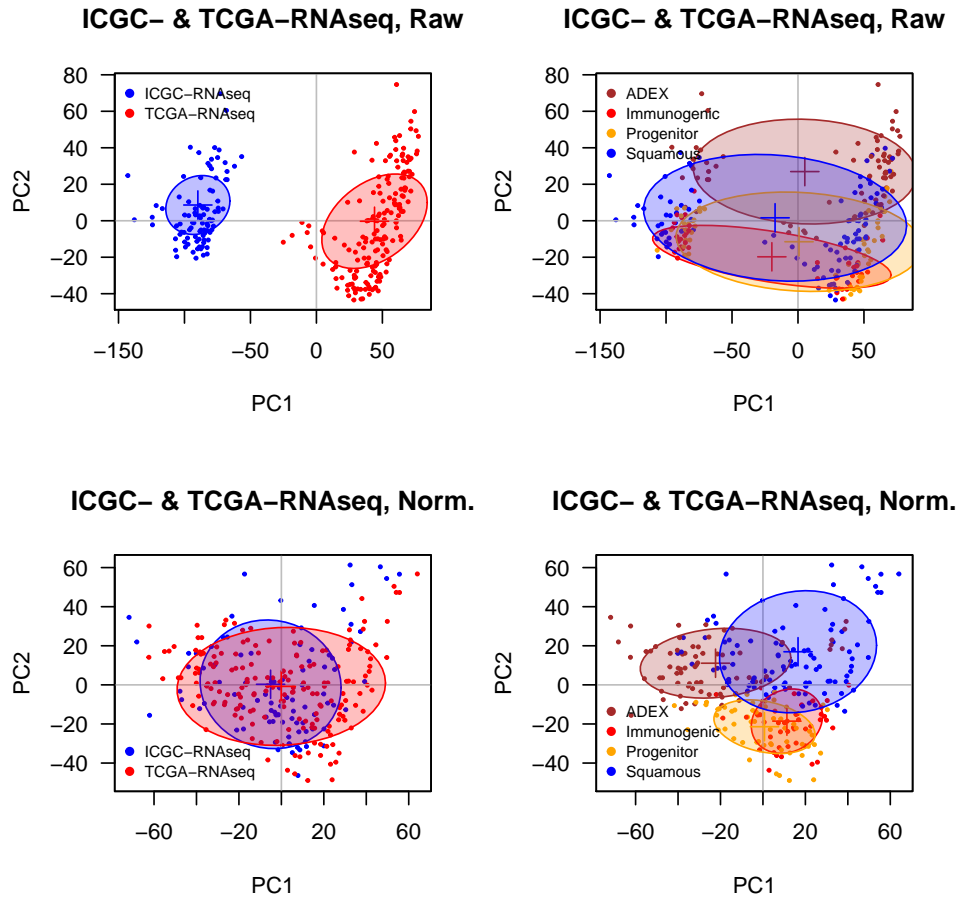

### 3.3 Supervised analysis, STS vs. LTS

#### 3.3.1 Limma, moderated t-statistics w/ empirical Bayes shrinkage

```

> rm(Eset_None, CHIP)
> load(paste(Path, "Rdata_ObjSets\\chip", annotation(Eset_Obj), sep="\\")) # chip annot.
> CHIP <- CHIP[match(featureNames(Eset_Obj), CHIP$PID),]
> GRP_DS <- rep(NA, ncol(Eset_Obj))
> GRP_DS[intersect(selPrim,
+                 which(pData(Eset_Obj)$OS.Evt == 1 & pData(Eset_Obj)$OS.Del <= 6))] <- "STS"
> GRP_DS[intersect(selPrim,
+                 which(pData(Eset_Obj)$OS.Evt == 0 & pData(Eset_Obj)$OS.Del >= 36))] <- "LTS"
> source("G:\\Ori Tools\\Prog\\Rwork\\Script\\20161017_MEF_Limma_fitoutput_optPaired.r")
> # Limma, moderated t-statistics of differential expression by empirical Bayes shrinkage
> DS_STS6m36m <- fitLimmaeBayes_PF(exprs(Eset_Obj), GRP=GRP_DS)
> # Selection of significant genes following chosen thresholds (i.e. p<5%, q<25% & |FC|>2x)
> DS_STS6m36m <- LimmaSignificant_Genes(DS_STS6m36m,
+                                     Threshold=list(p=0.05, q=0.05, FC=1)) # FC : log2

```

Volcano plot of the analysis

```
> par(mfrow=c(1,1))
> VolcPlot_LimmaRes(DS_STS6m36m)
> text(c(3,-3), y=c(7,7), paste("N =", unlist(lapply(DS_STS6m36m$selGeneDS,length))),
+     col=c("red", "green3"), cex=0.85)
> title(paste("moderated t-test, limma\n", length(which(GRP_DS %in% "STS")),
+           "STS vs.", length(which(GRP_DS %in% "LTS")), "LTS"))
```

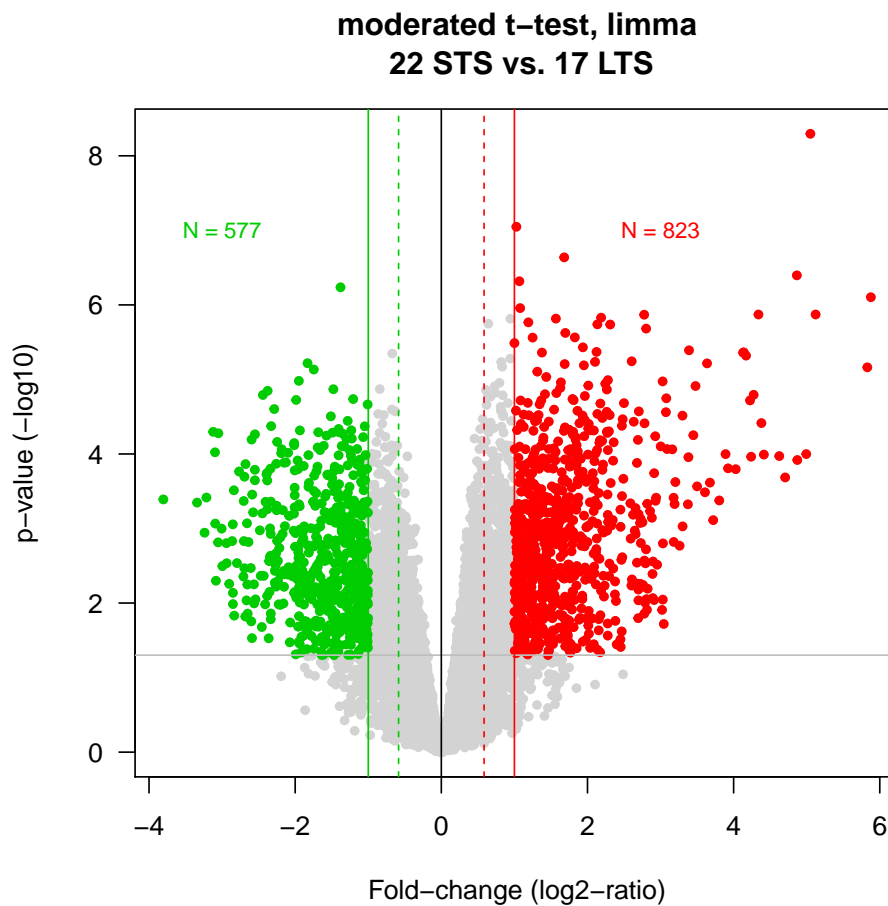

### 3.3.2 LASSO selection from 1400 genes

```

> require(glmnet)
> sel_STS636 <- intersect(selPrim, which(!is.na(GRP_DS)))
> Mat_GES <- as.matrix(t(exprs(Eset_Obj)[
+   match(DS_STS6m36m$RES$GeneID[unlist(DS_STS6m36m$selGeneDS)], featureNames(Eset_Obj)),
+   sel_STS636]))
> fit_regL <- glmnet(Mat_GES, GRP_DS[sel_STS636], family="binomial", alpha=1)
> fit_regL_CVdev <- cv.glmnet(Mat_GES, GRP_DS[sel_STS636], family="binomial",
+   type.measure="deviance", nfolds=1e2)
> fit_regL_coef <- coef(fit_regL, s=fit_regL_CVdev$lambda.min)
> # Plot Cross-Validation LASSO model
> par(mfrow=c(1,2))
> plot(fit_regL_CVdev, las=1, main="Lasso fit CV")
> abline(v=log(fit_regL_CVdev$lambda.min), col="orange", lwd=2)
> text(log(fit_regL_CVdev$lambda.min), 1.4, paste("lambda.min=",
+   round(fit_regL_CVdev$lambda.min,4), "\n",
+   length(fit_regL_coef@i)-1, " genes" ,sep=""),
+   col="orange", cex=0.75, pos=4)
> # Plot lambda fit
> plot(fit_regL, xvar="lambda", las=1, main="Lasso coefficient")
> abline(v=log(fit_regL_CVdev$lambda.min), col="orange", lwd=2)

```

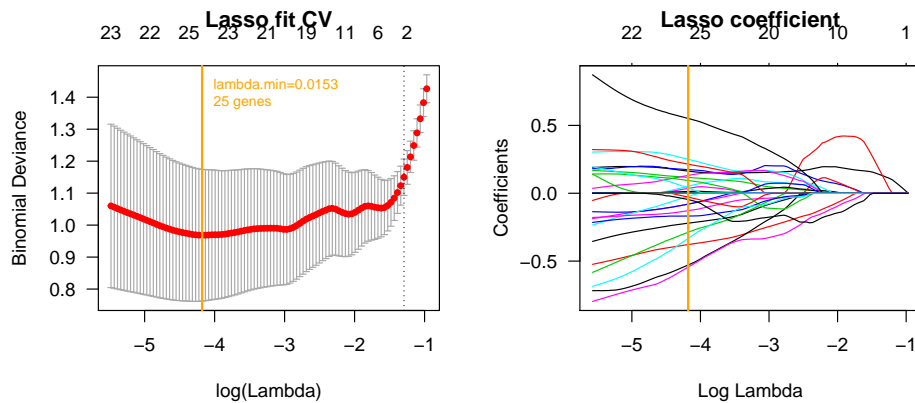



### 3.3.3 25-genes model classification preparation

```

> Model <- list(data=exprs(Eset_Obj)[
+   match(rownames(fit_regL_coef)[fit_regL_coef@i[!fit_regL_coef@i == 0]+1],
+     featureNames(Eset_Obj)),],
+   ref=CHIP[
+     match(rownames(fit_regL_coef)[fit_regL_coef@i[!fit_regL_coef@i == 0]+1],
+       CHIP$PID),],
+   grp=GRP_DS,
+   subset=selPrim)
> Model$ref$coef <- fit_regL_coef[fit_regL_coef@i[!fit_regL_coef@i == 0]+1]
> print(xtable(Model$ref[,c(3,5,6,9)],caption="25-genes model", table.placement="!h"),
+   size="footnotesize", include.rownames = FALSE)

```

| Gene.Symbol | map_location | EntrezGeneID | coef  |
|-------------|--------------|--------------|-------|
| GPR87       | 3q24         | 53836        | 0.16  |
| KRT13       | 17q21.2      | 3860         | 0.12  |
| RAC2        | 22q13.1      | 5880         | 0.17  |
| C16orf74    | 16q24.1      | 404550       | 0.05  |
| NAMPT       | 7q22.3       | 10135        | 0.04  |
| DHRS9       | 2q31.1       | 10170        | 0.01  |
| HIST2H2BF   | 1q21.2       | 440689       | 0.25  |
| TREM2       | 6p21.1       | 54209        | 0.13  |
| ZDHHC20     | 13q12.11     | 253832       | 0.55  |
| CD180       | 5q12         | 4064         | 0.21  |
| ADGRG6      | 6q24.1       | 57211        | 0.09  |
| APBB1IP     | 10p12.1      | 54518        | 0.04  |
| EGR3        | 8p23-p21     | 1960         | -0.08 |
| MACROD2     | 20p12.1      | 140733       | -0.22 |
| EPHA7       | 6q16.1       | 2045         | -0.38 |
| RASGEF1A    | 10q11.21     | 221002       | -0.29 |
| SYNM        | 15q26.3      | 23336        | -0.08 |
| S100A1      | 1q21         | 6271         | -0.02 |
| WNK2        | 9q22.3       | 65268        | -0.13 |
| RAMP2       | 17q12-q21.1  | 10266        | -0.53 |
| SOCS2       | 12q          | 8835         | -0.03 |
| COL28A1     | 7p21.3       | 340267       | -0.17 |
| B4GALT6     | 18q11        | 9331         | -0.33 |
| PLCB4       | 20p12        | 5332         | -0.54 |
| MTURN       | 7p14.3       | 222166       | -0.05 |

25-genes model

## 4 25-genes model, public data

### 4.1 Batch classification

```
> rm(Eset_Obj,CHIP)
> RES_List <- list()
> for ( i in 1:nrow(Set)){
+   load(paste(Path, "RData_ObjSets", Set$FileName[i], sep="\\"))
+   ##### import chip annot
+   Annotation <- annotation(Eset_Obj)
+   load(paste(Path, "RData_ObjSets\\chip", Annotation, ".RData", sep=""))
+   CHIP <- CHIP[match(featureNames(Eset_Obj), CHIP$PID),] # internal ctrl
+   ##### data matrix
+   DATA <- exprs(Eset_Obj)
+   ##### Classification :
+   ### 25-g model,
+   source("g:/Ori Tools/Prog/Rwork/Script/Classifier/20170410_Classif_GESsurvXtremRNAseq.r")
+   GES_PAADxtrem6m36m <- Classif_Bailey_PAAD_surv(DATA=DATA,
+                                               DATA_ID=CHIP$GeneID,
+                                               Model_Obj=Model,
+                                               Subset=Model$selPrim,
+                                               Nom=Set$Nom_ObjHC[i])
+   Tmp_25 <- data.frame(GES_PAADxtrem6m36m)
+   colnames(Tmp_25) <- paste("ges25g", colnames(Tmp_25), sep="_")
+   #####
+   rm(Eset_Obj, DATA, CHIP)
+ }
> ##### Merge classifications
> RES_Pool <- c()
> for (i in 1:length(RES_List)){
+   RES_Pool <- rbind(RES_Pool, cbind(RES_List[[i]],
+                                     Set=rep(Set$Nom_ObjHC[i], nrow(RES_List[[i]])))
+ }
> # final output
> GES25g <- RES_Pool$ges25g_grp_pred
```

Evaluation classification 25g-model, learning set pre-normalization :

```
> # Contingence table, observed vs. predicted groups
> print(xtable(table(Predicted=GES25g[selLearn], Observed=GRP_STS6m36m[selLearn]),
+ caption="25-genes model", table.placement="!h"),
+       size="small", include.rownames = TRUE)
```

|          | LTS | STS |
|----------|-----|-----|
| LTS-like | 17  | 0   |
| STS-like | 0   | 22  |

25-genes model

```
> # Overall survival (OS), Kaplan-Meier
> source("G:\\Ori Tools\\Prog\\Rwork\\Script\\survie.PF\\Survival.PF\\R\\Surv.PF-20160325.r")
> source("G:\\Ori Tools\\Prog\\Rwork\\Script\\survie.PF\\Survival.PF\\R\\PlotSurv.PF.R")
> KM_OS_25g_Learn <- Surv.PF(GES25g, VAR_ListSurv$OS$Evt, VAR_ListSurv$OS$Del, "Overall",
+                             Subset=selLearn, Y=24, Print = FALSE)
> PlotSurv.PF(KM_OS_25g_Learn, style=1, color=c(1,2), mark=FALSE, limit=60,
+             nom="25-gene model, learning", position=c(5,0.1), cex=0.8)
```

**25-gene model, learning  
N = 39**

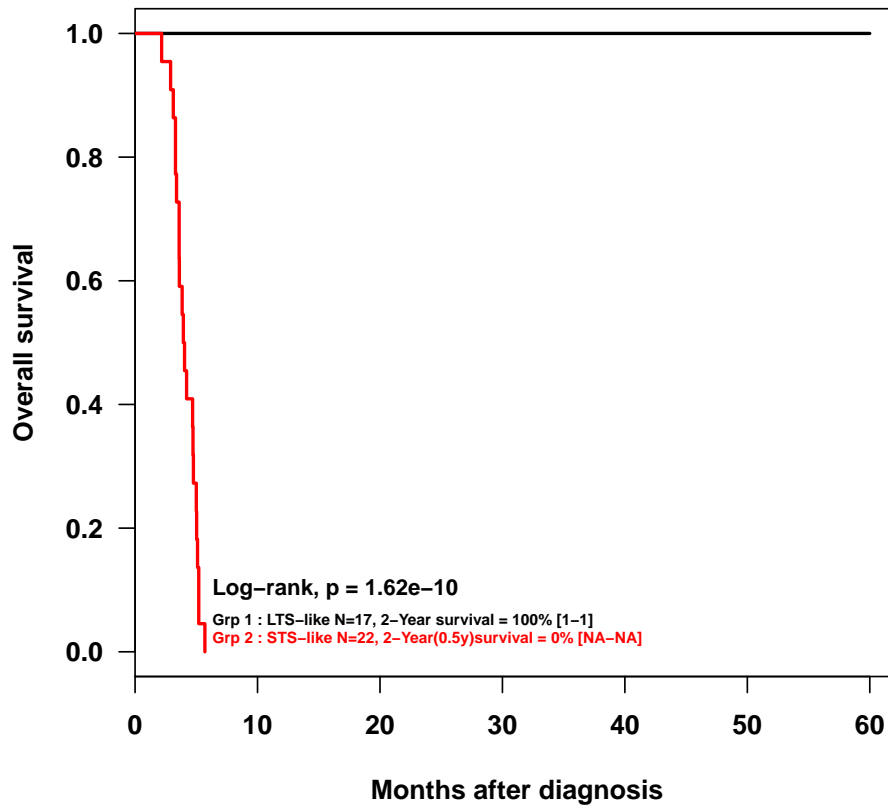

## 4.2 Validation set, statistics on 25-gene model (N=562)

### 4.2.1 Description groups of the 25-genes classification

```
> source("g:/Ori Tools/Prog/Rwork/Script/Table.PF/Table.PF.r")
> TabDesc_GES25g_valid <- Table_PF(GES25g, VAR_List, Subset=sel562)
> colnames(TabDesc_GES25g_valid)[c(3,6)] <- c("N", "p-value")
> print(xtable(TabDesc_GES25g_valid[,1:6],
+             caption="Association w/ 25-genes model groups", table.placement="!h"),
+       size="footnotesize", include.rownames = FALSE)

> KM_OS_Valid <- Surv.PF(NULL, VAR_ListSurv$OS$Evt, VAR_ListSurv$OS$Del,
+                       "Overall", Subset=sel562, Y=24, Print = FALSE)
> KM_OS_25g_Valid <- Surv.PF(GES25g, VAR_ListSurv$OS$Evt, VAR_ListSurv$OS$Del,
+                            "Overall", Subset=sel562, Y=24, Print = FALSE)
> par(mfrow=c(1,2))
> PlotSurv.PF(KM_OS_Valid, style=1, color=c(1), mark=FALSE, limit=60, pVal=FALSE,
+             nom="Validation set", position=c(1,0.1), cex=0.75)
> PlotSurv.PF(KM_OS_25g_Valid, style=1, color=c(1,2), mark=FALSE, limit=60,
+             nom="25-gene model, validation set", position=c(1,0.1), cex=0.75)
```

| Var              | Mod                        | N   | LTS.like | STS.like  | p-value |
|------------------|----------------------------|-----|----------|-----------|---------|
| Age              | <=60                       | 108 | 64(31%)  | 44(38%)   | 0.219   |
|                  | >60                        | 217 | 145(69%) | 72(62%)   |         |
| Sex              | female                     | 157 | 105(50%) | 52(44%)   | 0.419   |
|                  | male                       | 171 | 106(50%) | 65(56%)   |         |
| Stade            | 1                          | 54  | 35(12%)  | 19(11%)   | 0.759   |
|                  | 2                          | 403 | 255(84%) | 148(85%)  |         |
|                  | 3                          | 10  | 5(2%)    | 5(3%)     |         |
|                  | 4                          | 11  | 8(3%)    | 3(2%)     |         |
| Histo            | ductal                     | 504 | 308(98%) | 196(100%) | 0.0868  |
|                  | other                      | 6   | 6(2%)    | 0(0%)     |         |
| Grade            | 1                          | 27  | 24(16%)  | 3(3%)     | 0.00157 |
|                  | 2                          | 138 | 90(59%)  | 48(54%)   |         |
|                  | 3                          | 75  | 38(25%)  | 37(42%)   |         |
|                  | 4                          | 2   | 1(1%)    | 1(1%)     |         |
| pT               | 1                          | 15  | 9(4%)    | 6(5%)     | 0.879   |
|                  | 2                          | 57  | 36(16%)  | 21(16%)   |         |
|                  | 3                          | 281 | 181(78%) | 100(76%)  |         |
|                  | 4                          | 11  | 6(3%)    | 5(4%)     |         |
| pN               | 0                          | 123 | 79(30%)  | 44(29%)   | 0.824   |
|                  | 1                          | 291 | 183(70%) | 108(71%)  |         |
| Collisson        | Centroid_Classical.PDA     | 223 | 130(38%) | 93(43%)   | 1e-06   |
|                  | Centroid_Exocrine.like.PDA | 194 | 147(42%) | 47(22%)   |         |
|                  | Centroid_QM.PDA            | 145 | 69(20%)  | 76(35%)   |         |
| Moffitt_NMF_type | Basal.like                 | 214 | 88(25%)  | 126(58%)  | 7.8e-15 |
|                  | Classical                  | 348 | 258(75%) | 90(42%)   |         |
| Bailey           | ADEX                       | 128 | 114(33%) | 14(6%)    | 1e-06   |
|                  | Immunogenic                | 101 | 69(20%)  | 32(15%)   |         |
|                  | Pancreatic_Progenitor      | 133 | 90(26%)  | 43(20%)   |         |
|                  | Squamous                   | 200 | 73(21%)  | 127(59%)  |         |

Association w/ 25-genes model groups

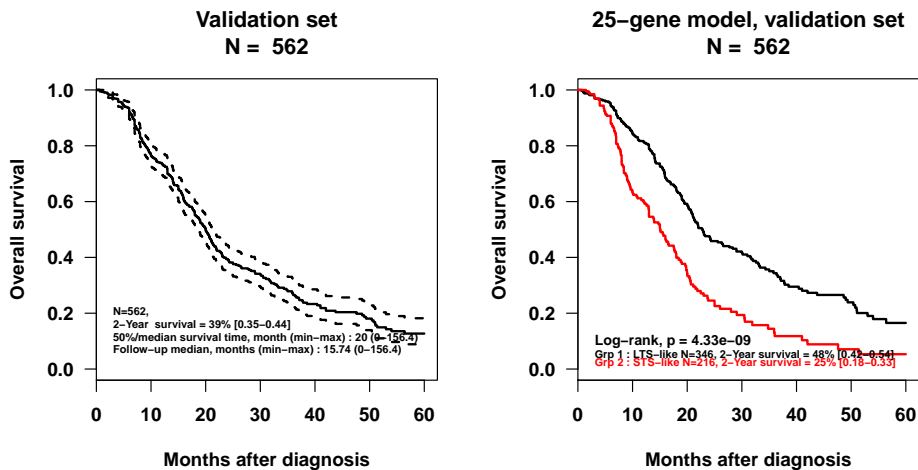

## 4.2.2 Univariate and multivariate OS analysis (valid, N=562)

Univariate all variables HC and 25-gene classification (Cox's regression)

```
> source("G:\\Ori Tools\\Prog\\Rwork\\Script\\20161108_UV.batch.r")
> UV_OS_Valid <- Batch.UV.PF(c(VAR_List, list(GES25g=GES25g)),
+                             VAR_ListSurv$OS$Evt, VAR_ListSurv$OS$Del,
+                             nom= "", Subset=sel562, PRINT=FALSE )
> print(xtable(UV_OS_Valid$Res.Batch[,c(1:4,6)],
+             caption="Univariate on validation set",
+             table.placement="!h"),
+       size="footnotesize", include.rownames = FALSE)
```

| VAR              | MODTEST                    | n   | HR.95CI.          | p        |
|------------------|----------------------------|-----|-------------------|----------|
| Age              | >60                        | 325 | 1.22 [0.88-1.7]   | 0.234    |
| Sex              | male                       | 328 | 1.08 [0.8-1.45]   | 0.633    |
| Stade            | 2                          | 478 | 2.01 [1.32-3.07]  | 4.71e-03 |
|                  | 3                          |     | 3.11 [1.33-7.23]  |          |
|                  | 4                          |     | 2.85 [1.16-7.05]  |          |
| Histo            | other                      | 510 | 0.36 [0.09-1.45]  | 0.151    |
| Grade            | 2                          | 242 | 1.52 [0.65- 3.55] | 0.185    |
|                  | 3                          |     | 2.15 [0.91- 5.11] |          |
|                  | 4                          |     | 2.66 [0.53-13.29] |          |
| pT               | 2                          | 364 | 1.49 [0.62-3.59]  | 0.131    |
|                  | 3                          |     | 1.95 [0.86-4.42]  |          |
|                  | 4                          |     | 2.93 [1.01-8.48]  |          |
| pN               | 1                          | 414 | 1.83 [1.34-2.48]  | 1.24e-04 |
| Collisson        | Centroid_Exocrine.like.PDA | 562 | 1.00 [0.77-1.29]  | 2.32e-03 |
|                  | Centroid_QM.PDA            |     | 1.52 [1.17-1.99]  |          |
| Moffitt_NMF_type | Classical                  | 562 | 0.64 [0.51-0.8]   | 6.29e-05 |
| Bailey           | Immunogenic                | 562 | 0.81 [0.57-1.17]  | 8.98e-06 |
|                  | Pancreatic_Progenitor      |     | 0.97 [0.70-1.35]  |          |
|                  | Squamous                   |     | 1.64 [1.22-2.19]  |          |
| GES25g           | STS-like                   | 562 | 1.93 [1.55-2.42]  | 7.47e-09 |

Univariate on validation set

Multivariate significant variables HC and 25-gene classification (Cox's regression)

```
> MV_OS_HC_Valid <- MV.PF(coxph(Surv(VAR_ListSurv$OS$Del, VAR_ListSurv$OS$Evt) ~
+                               Stade + pN + GES25g, data=VAR_List, subset=sel562))
> print(xtable(MV_OS_HC_Valid$Cox.MV,
+             caption="Multivariate, histo-clinical + 25-gene",
+             table.placement="!h"),
+       size="small", include.rownames = TRUE)
```

|                | N   | HR   | CI95         | p        |
|----------------|-----|------|--------------|----------|
| Stade2         | 408 | 1.57 | [0.88-2.82]  | 0.128    |
| Stade3         | 408 | 2.21 | [0.82-5.97]  | 0.119    |
| Stade4         | 408 | 1.44 | [0.19-10.97] | 0.723    |
| pN1            | 408 | 1.5  | [1.04-2.16]  | 2.95e-02 |
| GES25gSTS-like | 408 | 2.04 | [1.54-2.7]   | 6.33e-07 |

Multivariate, histo-clinical + 25-gene

Multivariate significant variables HC and 25-gene classification (Cox's regression)

```
> MV_OS_Subtype_Valid <- MV.PF(coxph(Surv(VAR_ListSurv$OS$Del, VAR_ListSurv$OS$Evt) ~
+                               Collisson + Moffitt_NMF_type + Bailey + GES25g,
+                               data=VAR_List, subset=sel562))
> print(xtable(MV_OS_Subtype_Valid$Cox.MV,
+             caption="Multivariate, molecular subtypes + 25-gene",
+             table.placement="!h"),
+       size="small", include.rownames = TRUE)
```

|                                     | N   | HR   | CI95        | p        |
|-------------------------------------|-----|------|-------------|----------|
| CollissonCentroid_Exocrine.like.PDA | 562 | 0.94 | [0.66-1.34] | 0.732    |
| CollissonCentroid_QM.PDA            | 562 | 1.15 | [0.83-1.59] | 0.395    |
| Moffitt_NMF_typeClassical           | 562 | 1    | [0.72-1.38] | 0.994    |
| BaileyImmunogenic                   | 562 | 0.68 | [0.43-1.06] | 0.09     |
| BaileyPancreatic_Progenitor         | 562 | 0.79 | [0.51-1.23] | 0.302    |
| BaileySquamous                      | 562 | 1.09 | [0.68-1.74] | 0.731    |
| GES25gSTS-like                      | 562 | 1.77 | [1.38-2.26] | 6.33e-06 |

Multivariate, molecular subtypes + 25-gene

### 4.3 Evaluation 25-gene model and molecular subtypes

```

> # Surv. objects
> KM_OS_25g_Collisson <- Surv.PF(interaction(GES25g, VAR_List$Collisson),
+                               VAR_ListSurv$OS$Evt, VAR_ListSurv$OS$Del,
+                               nom= "Overall", Subset=sel562, Print=FALSE, Y=24)
> KM_OS_25g_Moffitt_type <- Surv.PF(interaction(GES25g, VAR_List$Moffitt_NMF_type),
+                               VAR_ListSurv$OS$Evt, VAR_ListSurv$OS$Del,
+                               nom= "Overall", Subset=sel562, Print=FALSE, Y=24)
> KM_OS_25g_Bailey <- Surv.PF(interaction(GES25g, VAR_List$Bailey),
+                               VAR_ListSurv$OS$Evt, VAR_ListSurv$OS$Del,
+                               nom= "Overall", Subset=sel562, Print=FALSE, Y=24)
> # Kaplan-Meier plot, surv objects
> par(mfrow=c(2,2))
> # Collisson + 25-gene
> PlotSurv.PF(KM_OS_25g_Collisson, style=rep(c(2,1),3),
+             color=c(rep("orange",2), rep("blue",2), rep("red",2)),
+             nom="Collisson + GES25g", mark=F, LWD=rep(c(1,3),3), limit=60,
+             position=c(0,0.1), pVal=TRUE, texte=FALSE, cex=0.8)
> legend(0,0.4,c("STS-like", "LTS-like"), box.col=0, lty=c(1,2), lwd=c(3,1), cex=0.5)
> legend("topright", c("Exocrine-like", "Classical", "Quasi-mesenchymal"),
+       text.col=c("blue", "orange", "red"), cex=0.75, box.col=0) ; box()
> # Moffitt, tumor + 25-gene
> PlotSurv.PF(KM_OS_25g_Moffitt_type, style=rep(c(2,1),2),
+             color=c(rep("red",2), rep("orange",2)),
+             nom="Moffitt tumor + GES25g", mark=F, LWD=rep(c(1,3),2), limit=60,
+             position=c(0,0.1), pVal=TRUE, texte=FALSE, cex=0.8)
> legend(0,0.4,c("STS-like", "LTS-like"), box.col=0, lty=c(1,2), lwd=c(3,1), cex=0.5)
> legend("topright", c("Classical", "Basal"),
+       text.col=c("orange", "red"), cex=0.75, box.col=0) ; box()
> # Bailey + 25-gene
> PlotSurv.PF(KM_OS_25g_Bailey, style=rep(c(2,1),4),
+             color=c(rep("blue",2), rep("green3",2), rep("orange",2), rep("red",2)),
+             nom="Bailey + GES25g", mark=F, LWD=rep(c(1,3),4), limit=60,
+             position=c(0,0.1), pVal=TRUE, texte=FALSE, cex=0.8)
> legend(0,0.4,c("STS-like", "LTS-like"), box.col=0, lty=c(1,2), lwd=c(3,1), cex=0.5)
> legend("topright", c("Pancreatic progenitor", "Immunogenic", "Squamous", "ADEX"),
+       text.col=c("orange", "green3", "red", "blue"), cex=0.75, box.col=0) ; box()

```

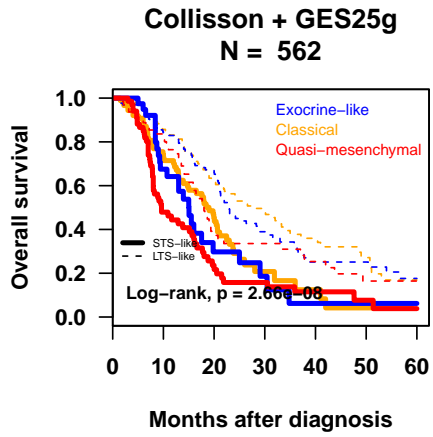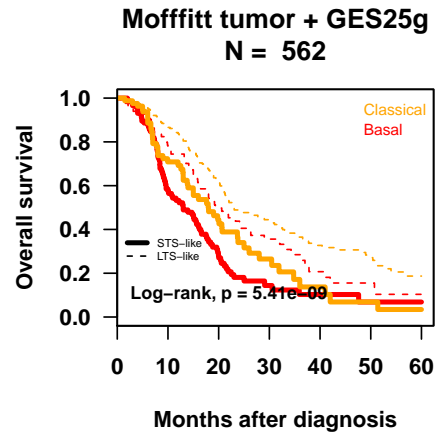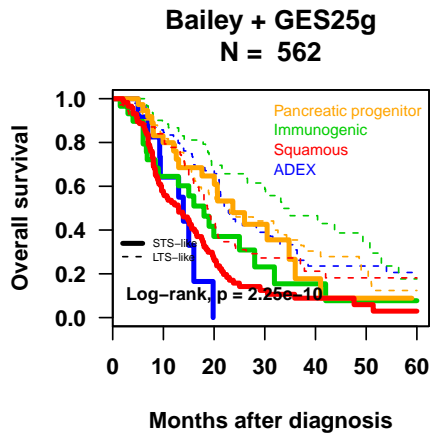

Kaplan-Meier curves of molecular subtypes w/ 25-gene classification
